# Supplementary material for: An intrinsic cell cycle timer terminates limb bud outgrowth
Source: eLife journal article supplement (doi:10.7554/elife.37429), 2018-09-03
Supplement: figures [file elife-37429-figures-v2.pdf]

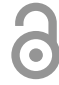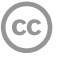

---

## Figures and figure supplements

An intrinsic cell cycle timer terminates limb bud outgrowth

**Joseph Pickering et al**

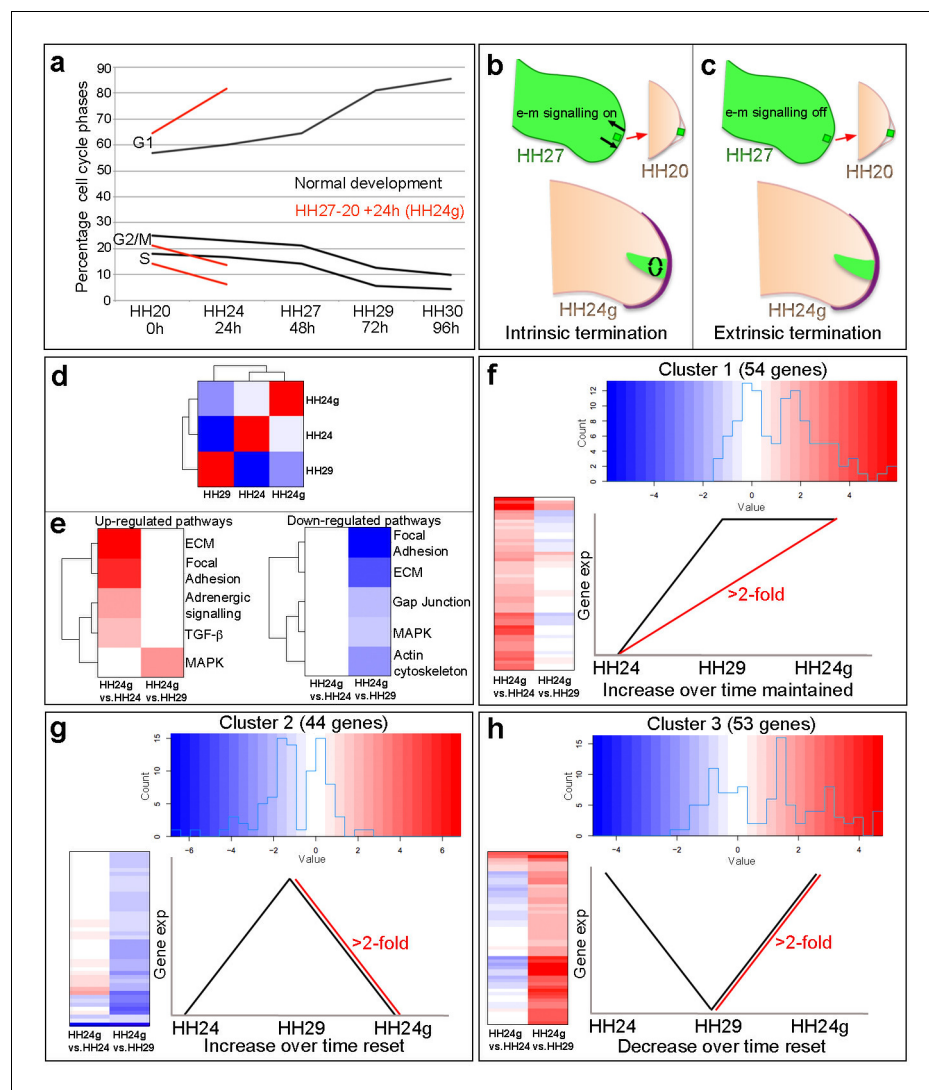

**Figure 1.** Cell cycle and RNA-seq analyses of chick wing distal tips. (a) Decline in cell cycle rate determined by proportions of cells in G1-, S- and G2/M-phases between HH20 and HH30 in the distal chick wing bud (black lines [Saiz-Lopez et al., 2017](#)). Red lines show maintenance of cell cycle program in grafts of HH27 distal tips made to HH20 wing buds left for 24 hr until HH24 (HH24g - tissue would have progressed from HH27 to HH29 in donor) – note trajectories follow same pattern as black lines between HH27 and HH29. (b–c) Procedure for making HH27-20 grafts ([Saiz-Lopez et al., 2017](#)) and predictions for loss of proliferative growth in HH24g mesenchyme. (b) Intrinsic termination: e-m signalling (arrows in HH27 wing bud) maintained between mesenchyme and apical ridge but proliferation declines intrinsically in mesenchyme independently of e-m signalling (curved arrows in HH24g mesenchyme). (c) Extrinsic termination: e-m signalling irreversibly lost between graft and apical ridge in HH27 bud (arrows absent) and proliferation lost in graft. (d) Heat-map showing the correlation (Pearson) of the normalised RNA-seq data collapsed to the mean expression per group and the degree of correlation indicated by the colour (red: higher, blue: lower). (e) KEGG analyses across pairwise contrasts with degree in pathway change indicated by the colour (red: up-regulated, blue: down-regulated). (f–h) Clustering of RNA-seq data across pairwise contrasts with degree of gene expression change indicated by the colour (red: higher, blue: lower). (f) Cluster 1: genes that increase between HH24 and HH29 (black line) and are maintained in HH24g (red line - > 2 fold higher in HH24g than HH24). (g) Cluster 2: genes that increase between HH24 and HH29 (black line) and reset in HH24g (red line - > 2 fold lower in HH24g than HH29). (h) Cluster 3: genes that decrease between HH24 and HH29 (black line) and reset in HH24g (red line - > 2 fold higher in HH24g than HH29).

DOI: <https://doi.org/10.7554/eLife.37429.002>

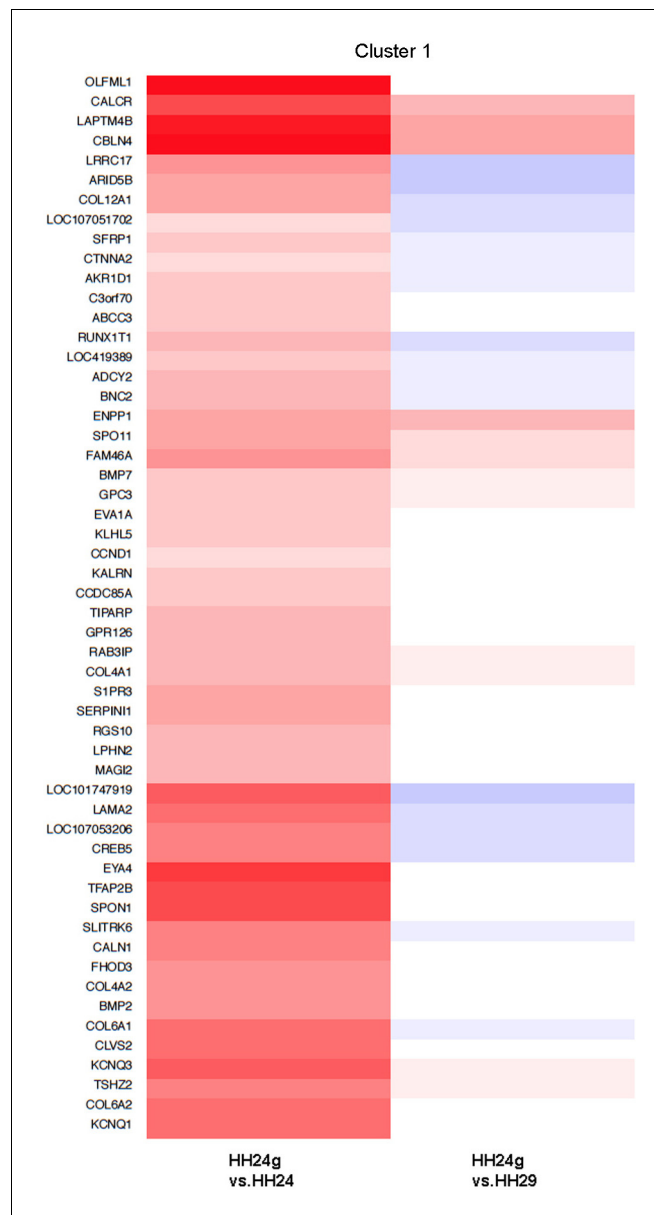

**Figure 1—figure supplement 1.** Cluster 1 Clustering of RNA-seq data across pairwise contrasts with degree of gene expression change indicated by the colour (red: higher, blue: lower). Cluster 1: genes that increase between HH24 and HH29 (black line) and are maintained in HH24g distal mesenchyme (red line - > 2 fold higher in HH24g than HH24).

DOI: <https://doi.org/10.7554/eLife.37429.003>

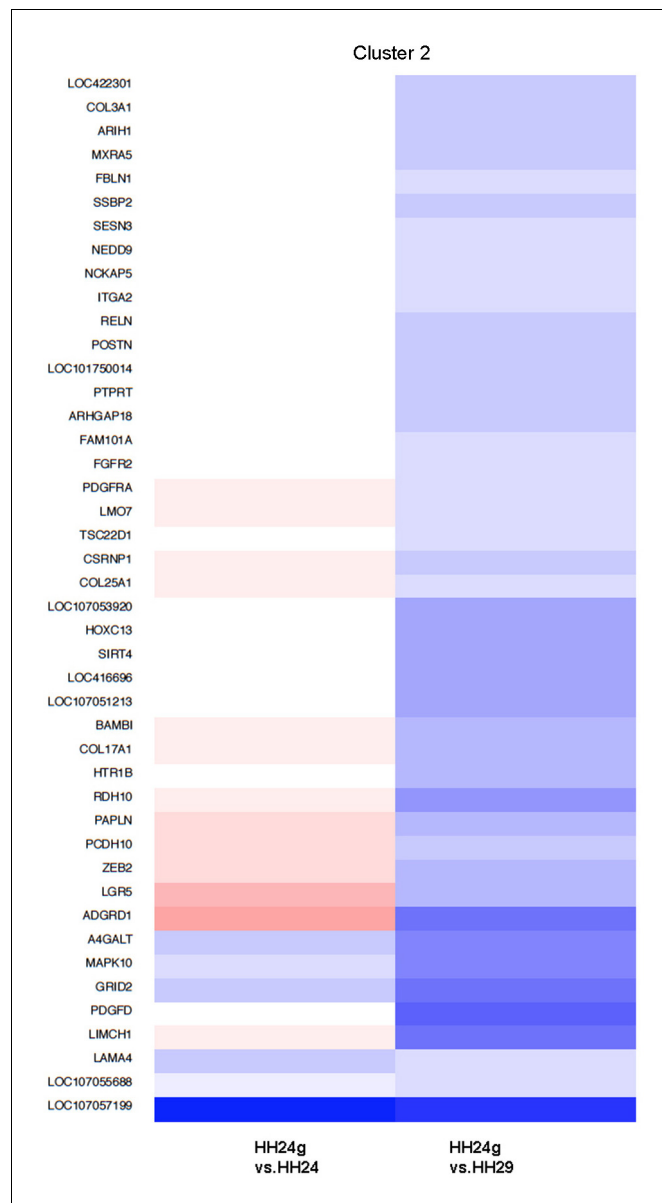

**Figure 1—figure supplement 2.** Cluster 2 Clustering of RNA-seq data across pairwise contrasts with degree of gene expression change indicated by the colour (red: higher, blue: lower). Cluster 2: genes that increase between HH24 and HH29 (black line) and reset in HH24g distal mesenchyme (red line - > 2 fold lower in HH24g than HH29). DOI: <https://doi.org/10.7554/eLife.37429.004>

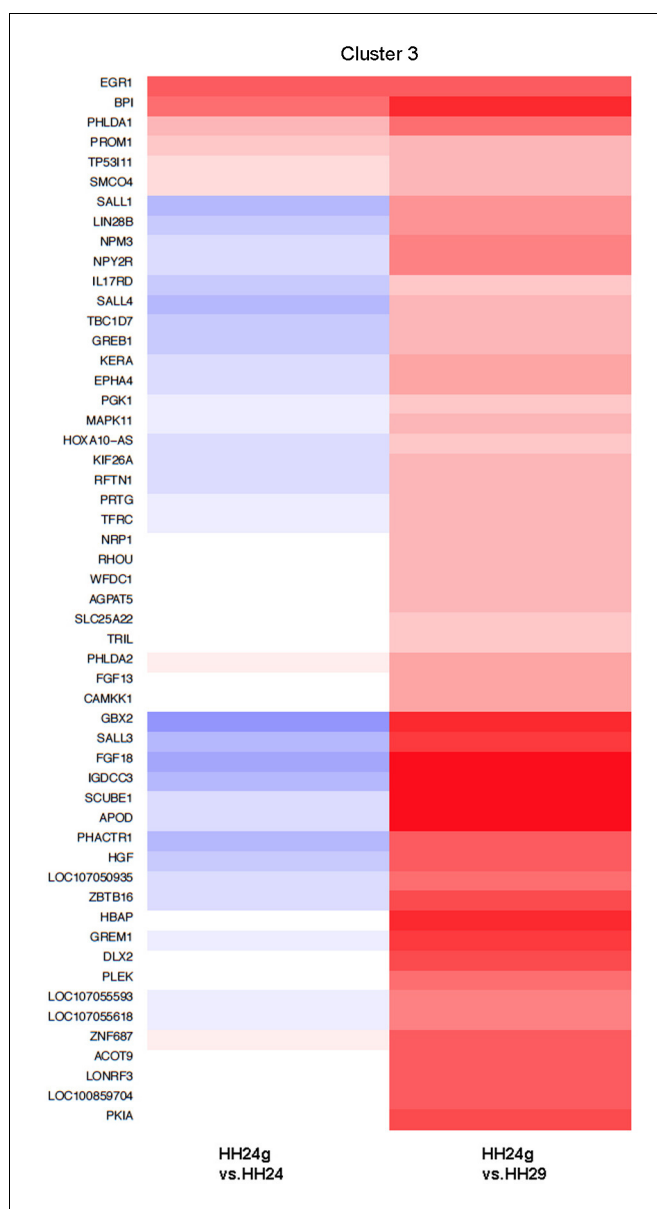

**Figure 1—figure supplement 3.** Cluster 3 Clustering of RNA-seq data across pairwise contrasts with degree of gene expression change indicated by the colour (red: higher, blue: lower). Cluster 3: genes that decrease between HH24 and HH29 (black line) and reset in HH24g distal mesenchyme (red line - > 2 fold higher in HH24g than HH29).

DOI: <https://doi.org/10.7554/eLife.37429.005>

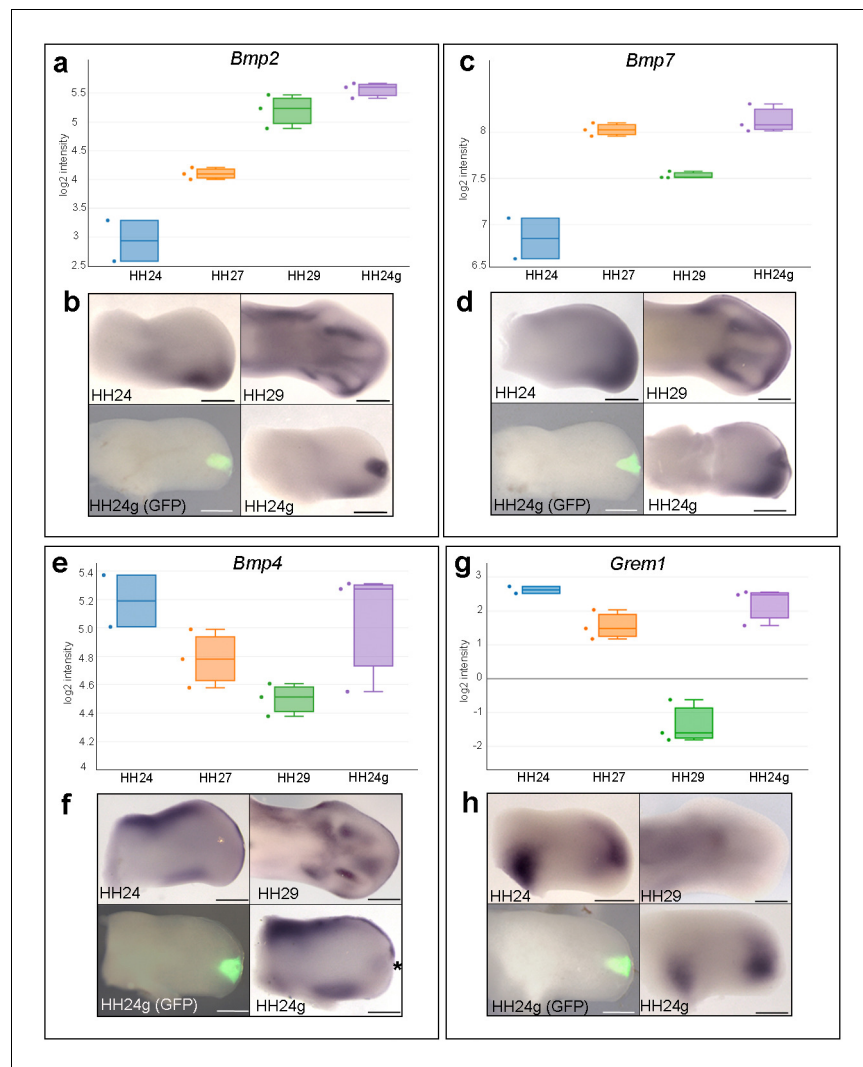

**Figure 2.** *Bmp2/4/7* and *Grem1* expression in HH24g mesenchyme. (a) Histogram showing expression levels of *Bmp2* as normalised log<sub>2</sub> values of RNA sequencing read-count intensities. (b) In situ hybridization showing *Bmp2* expression - note intense expression in HH24g mesenchyme in area of graft ( $n = 3/3$ , HH24 is the contralateral bud flipped horizontally). (c) Expression levels of *Bmp7* determined by RNA-seq. (d) In situ hybridization showing *Bmp7* expression - note intense region of expression in HH24g mesenchyme ( $n = 3/3$ ). (e) Expression levels of *Bmp4* determined by RNA-seq. (f) In situ hybridizations showing *Bmp4* expression - note enhanced expression in HH24g mesenchyme in area of graft (asterisk -  $n = 2/3$ ). (g) Expression levels of *Grem1* determined by RNA-seq. (h) In situ hybridizations showing resetting of *Grem1* expression ( $n = 7/9$ ). Scale bars: HH24 buds - 500  $\mu\text{m}$ ; HH29 buds - 200  $\mu\text{m}$ .

DOI: <https://doi.org/10.7554/eLife.37429.006>

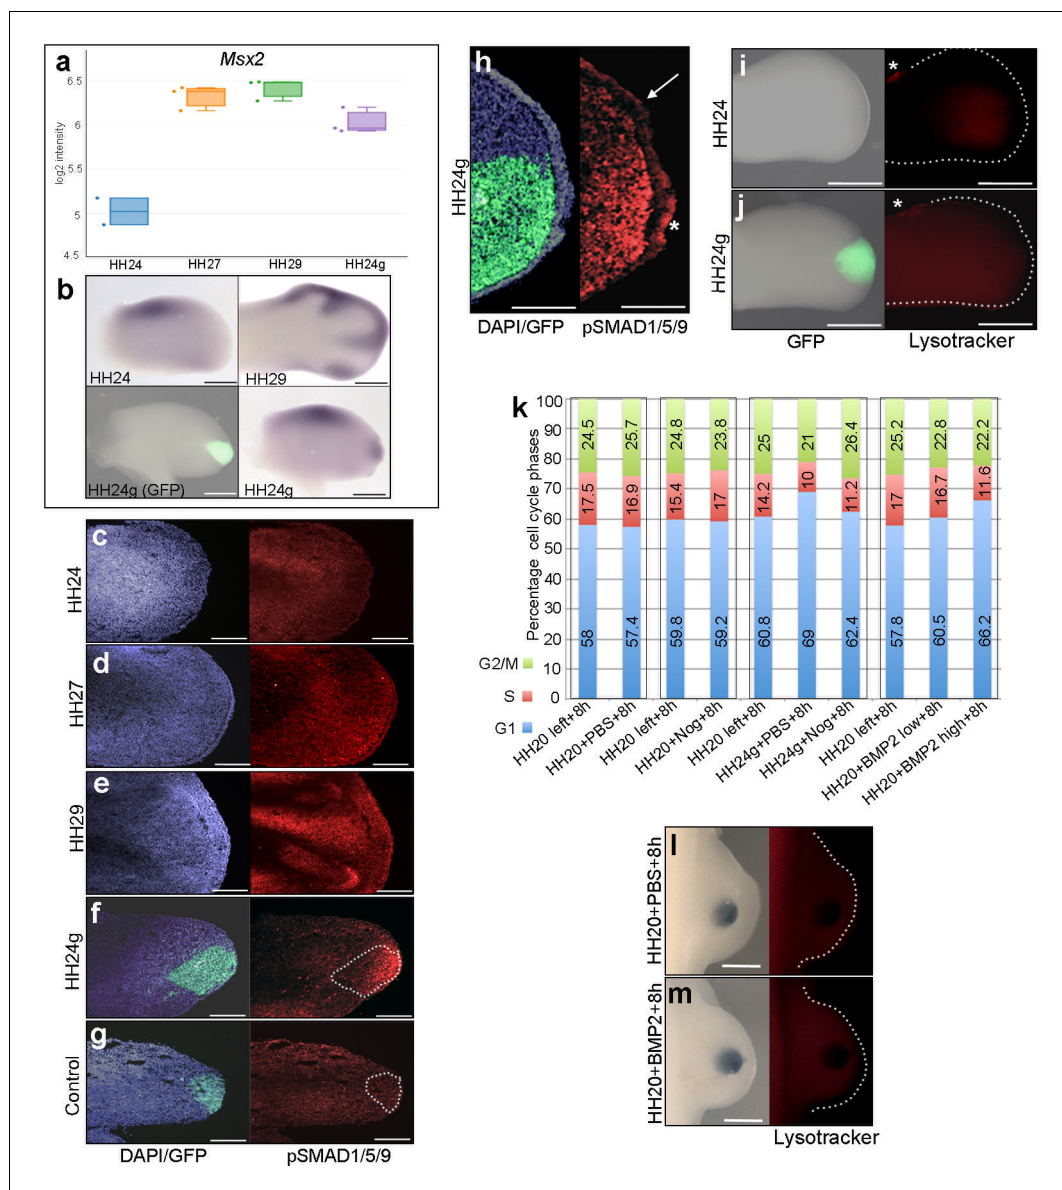

**Figure 3.** BMP signalling in HH24g mesenchyme (a) Expression levels of *Msx2* determined by RNA-seq. (b) In situ hybridization showing *Msx2* expression - note intense expression in HH24g mesenchyme in grafted area ( $n = 3/4$ ). (c–h) Immunostaining of pSMAD1/5/9: signal increases in the distal part of chick wing buds over time (c–e) and is enhanced in HH24g mesenchyme (f) compared to contralateral HH24 buds ( $n = 3/3$  c) but not in HH20-HH20 grafts ( $n = 2/2$  g); signal is enhanced in apical ectodermal ridge above grafts in HH24g mesenchyme (asterisk-h) but not adjacent regions of ridge ( $n = 2/2$  - arrow-h). (i–j) Lysotracker staining of apoptotic cells reveals no difference in HH24 (i) and HH24g (j) mesenchyme ( $n = 5/5$ ) – asterisks indicate anterior necrotic zone. (k) Flow cytometry of wing bud distal mesenchyme: PBS- and Noggin-soaked beads do not significantly affect proportion of cells in G1-phase after 8 hr compared to left wing controls (Pearson's  $\chi^2$  test –  $p=0.1$  and  $p=0.4$ , respectively); Noggin-soaked beads implanted at HH20 (+Nog) produce a significant decrease in proportion of cells in G1-phase in HH24g grafts compared to PBS-treated controls (+PBS) after 8 hr (Pearson's  $\chi^2$  test –  $p<0.0001$ ); BMP2-soaked beads implanted at HH20 significantly increase G1-phase cells after 8 hr compared to left wing controls (Pearson's  $\chi^2$  test –  $p<0.0001$ ), note boxes indicate separate experiments. (l–m) Lysotracker staining of apoptotic cells reveals no difference in PBS (l) –  $n = 2/2$  and BMP2 (m) –  $n = 2/2$  treated mesenchyme after 8 hr. Scale bars: HH24 buds – 500  $\mu\text{m}$ , HH29 buds – 200  $\mu\text{m}$  in b; 150  $\mu\text{m}$  in c–g; 75  $\mu\text{m}$  in h; 300  $\mu\text{m}$  in i–j and l–m.

DOI: <https://doi.org/10.7554/eLife.37429.007>

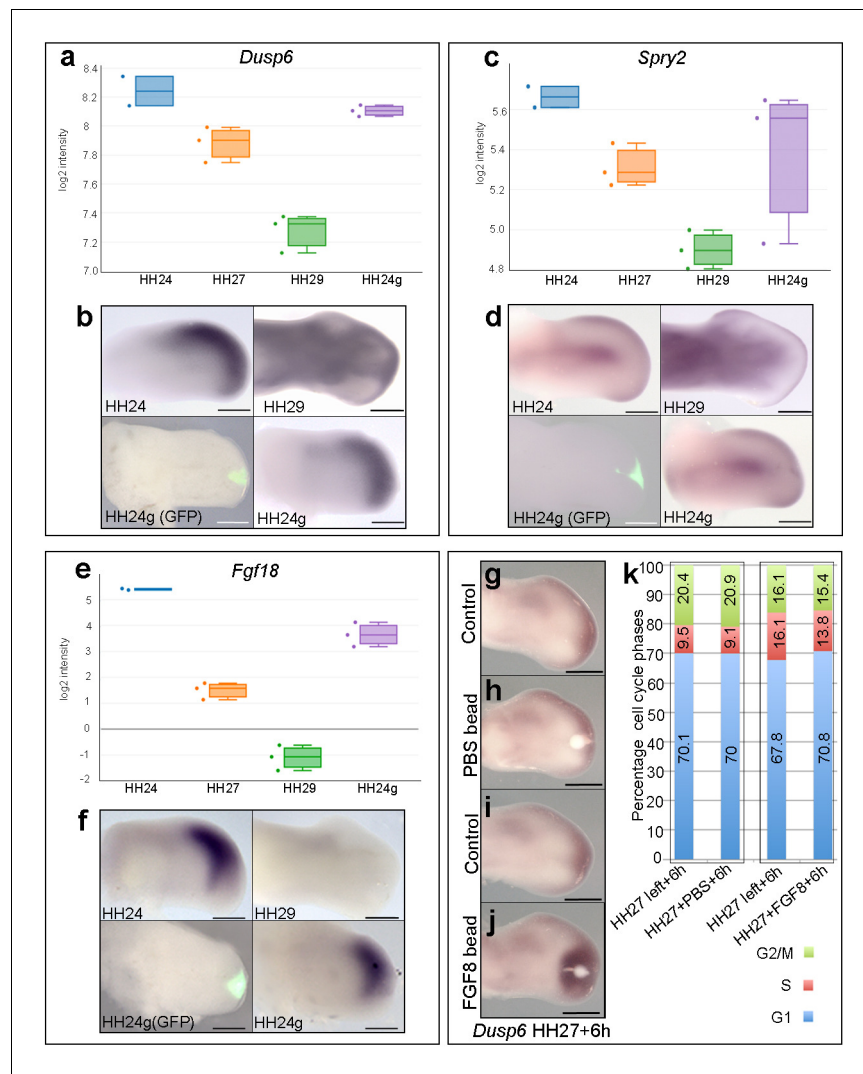

**Figure 4.** FGF signalling in HH24g mesenchyme. (a-e) Resetting of gene expression in HH24g mesenchyme. Expression levels of *Dusp6* (a), *Spry2* (c) and *Fgf18* (e) determined by RNA-seq. (b) In situ hybridization showing equivalent levels of *Dusp6* ( $n = 3/3$ ), (b), *Spry2* ( $n = 3/3$ ), (d), and *Fgf18* ( $n = 3/3$ ), (f) in HH24 and contralateral HH24g mesenchyme. (g-j) FGF-soaked beads (j)  $n = 3/3$ ), but not PBS-soaked beads (h)  $n = 3/3$ ), up-regulate expression of *Dusp6* after 6 hr (control left wing buds flipped horizontally – (g) and (i)). (k) Flow cytometry of wing bud distal mesenchyme: PBS-soaked beads do not significantly affect proportion of cells in G1-phase after 6 hr compared to left wing controls (Pearson's  $\chi^2$  test –  $p=0.5$ ); FGF-soaked beads implanted at HH27 significantly increase G1-phase cells compared to left wing control after 6 hr (Pearson's  $\chi^2$  test –  $p<0.0001$ ), note boxes indicate separate experiments. Scale bars: HH24 buds, HH27 buds - 300  $\mu\text{m}$ ; HH29 buds - 200  $\mu\text{m}$ .

DOI: <https://doi.org/10.7554/eLife.37429.009>

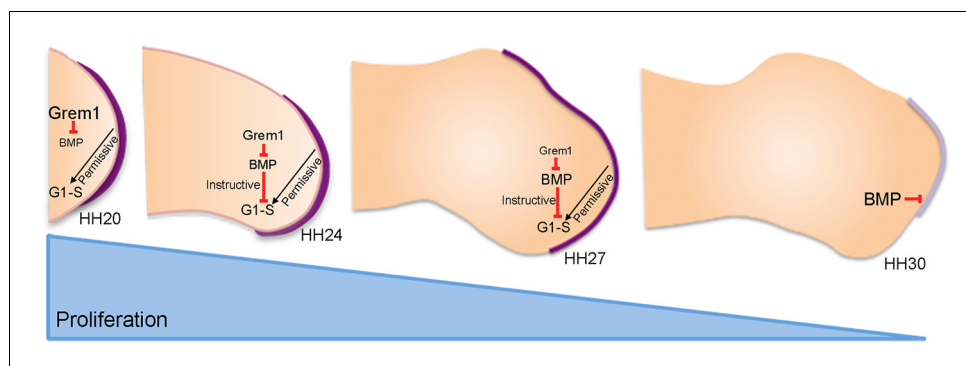

**Figure 5.** An intrinsic cell cycle timer terminates limb bud outgrowth. HH20-HH24: antagonism of BMP signalling by Grem1 permits rapid mesenchyme proliferation and maintenance of the apical ectodermal ridge (purple) that permissively supports outgrowth. HH24-HH27: intrinsic rise in BMP signalling counters BMP antagonism and instructively decelerates mesenchyme proliferation rate. HH27-HH30: mesenchyme proliferation diminishes as patterning completes at HH28 and then BMP signalling inhibits FGF signalling in apical ectodermal ridge that then regresses.

DOI: <https://doi.org/10.7554/eLife.37429.011>
