# Supplementary material for: An intrinsic cell cycle timer terminates limb bud outgrowth
Source: eLife journal article supplement (doi:10.7554/elife.37429), 2018-09-03

Source data for flow cytometry in Figure 3k

HH20 left+8h

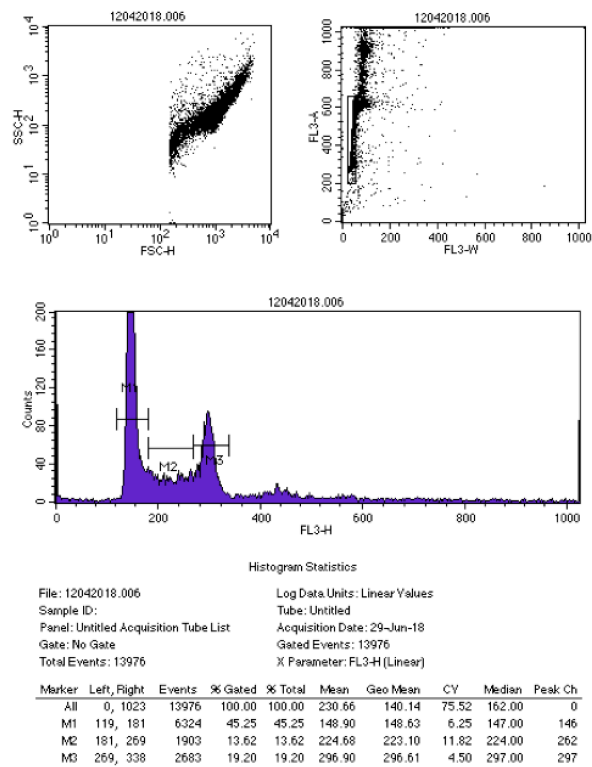

HH20+PBS+8h

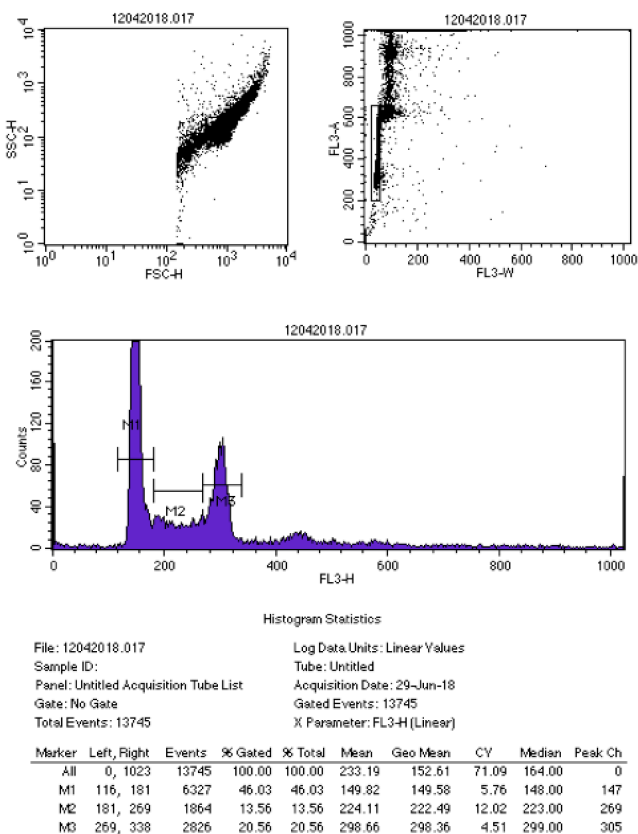

HH20 left+8h

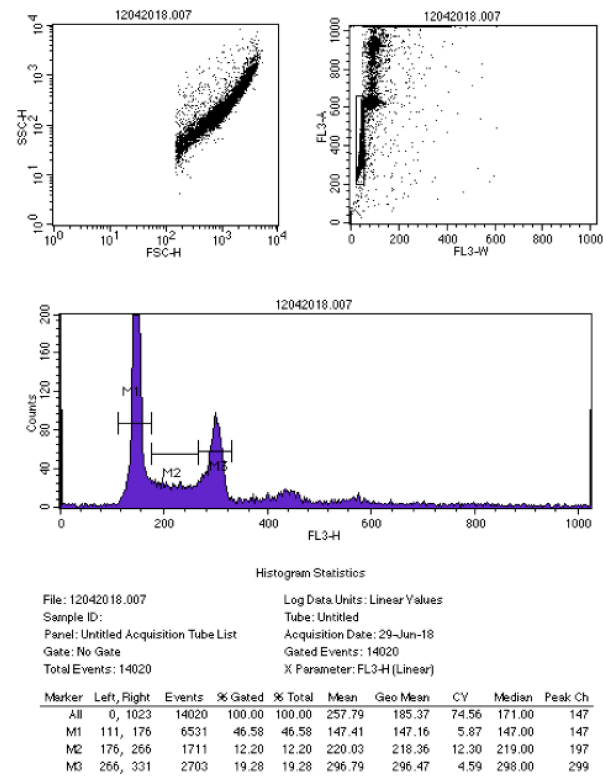

HH20+Nog+8h

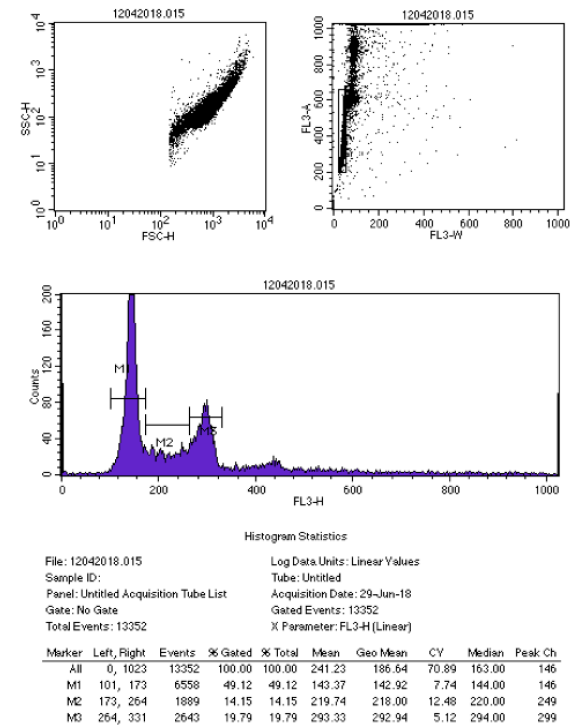

HH20 left+8h

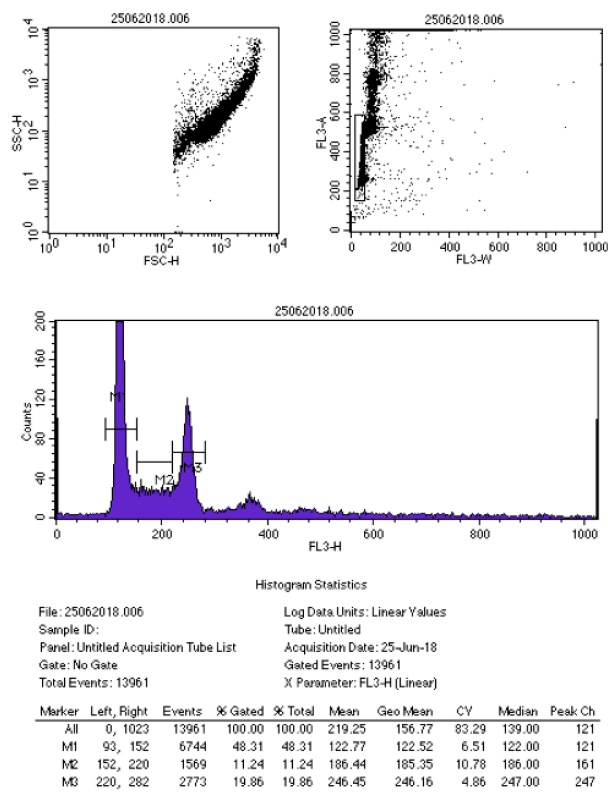

HH24g+ PBS+8h

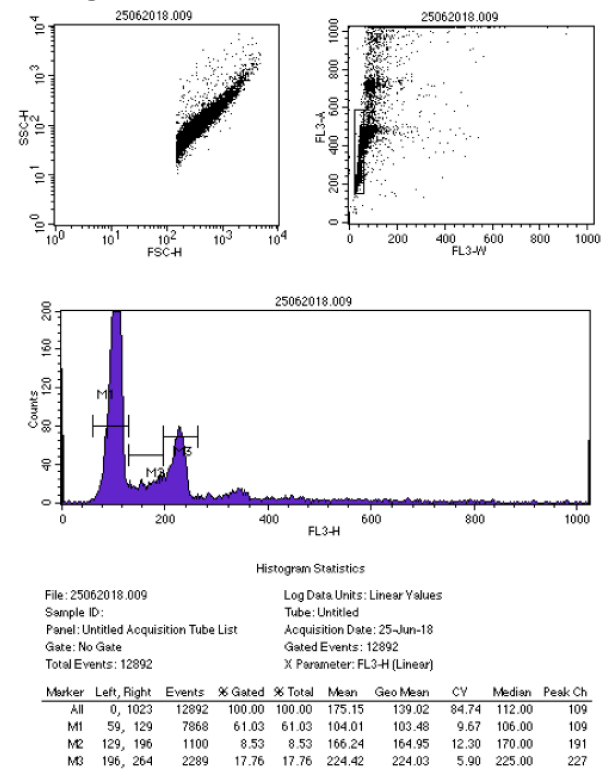

HH24g+Nog+8h

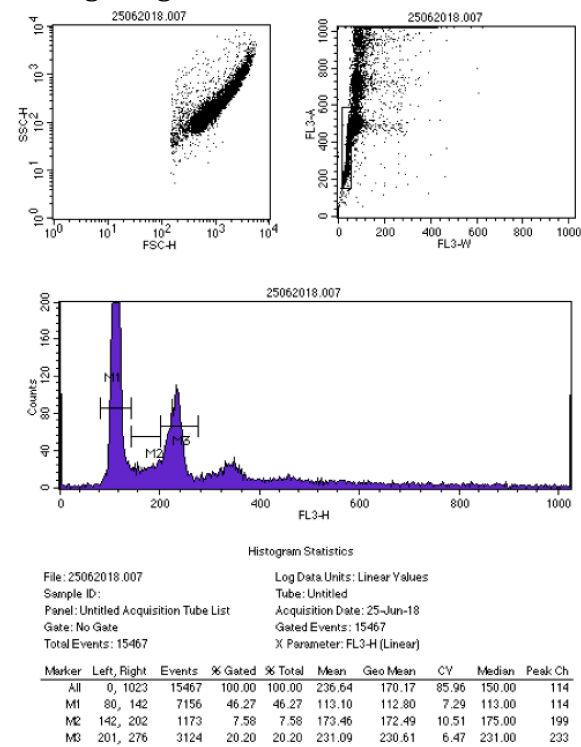

HH20 left+8h

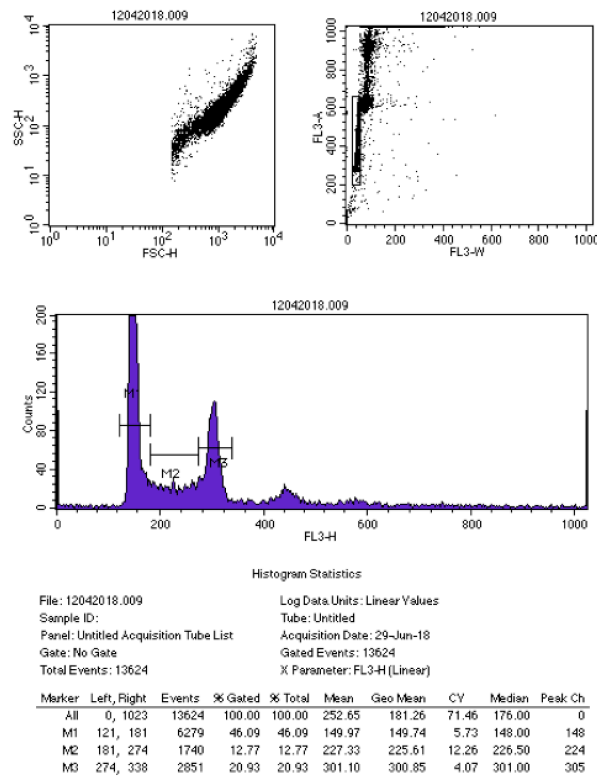

HH20+Bmp2 low+8h

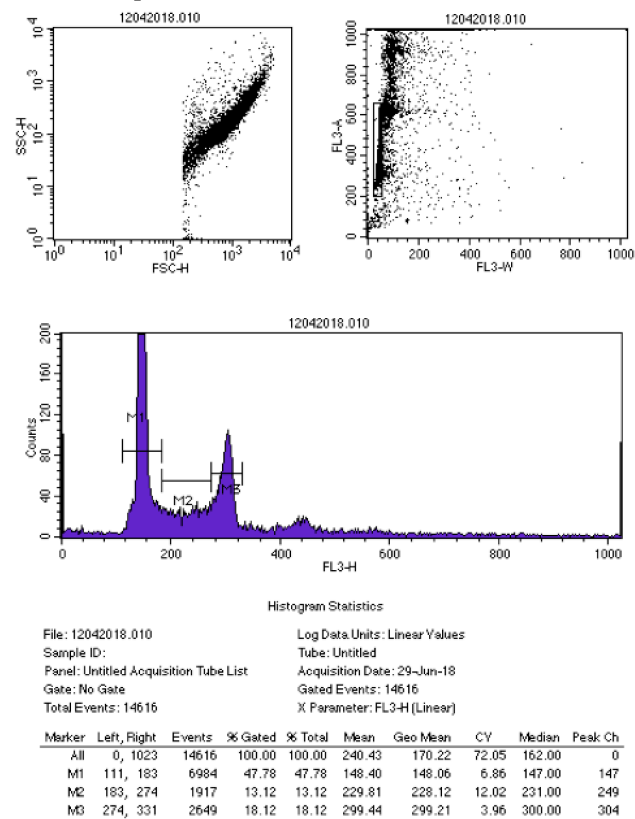

HH20+Bmp2 high+8h

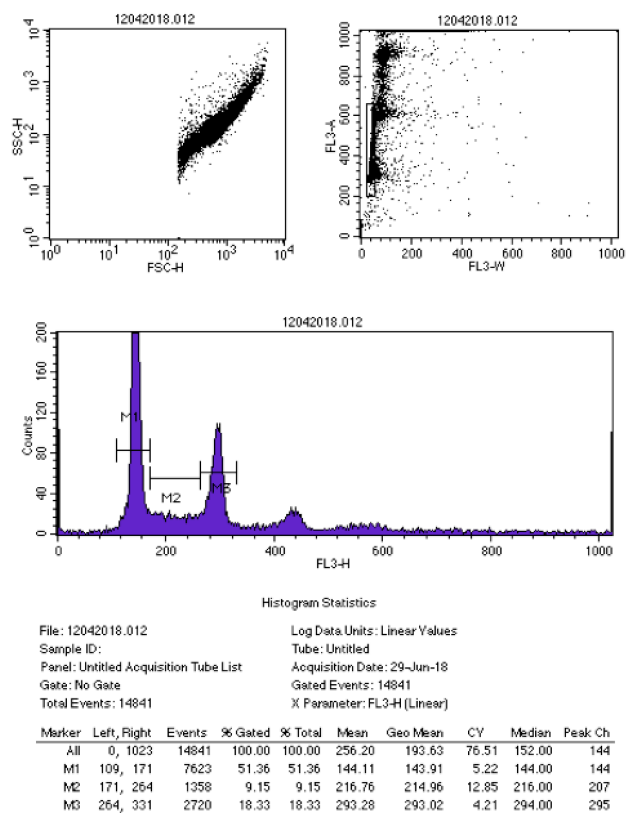

Supplement: supp [file elife_poa_e37429_Figure_3_source_data_1.pdf › elife_poa_e37429_Figure_3_source_data_1.pdf]
