# Supplementary material for: An intrinsic cell cycle timer terminates limb bud outgrowth
Source: eLife journal article supplement (doi:10.7554/elife.37429), 2018-09-03

Source data for flow cytometry in Figure 4k

HH27 left+6h

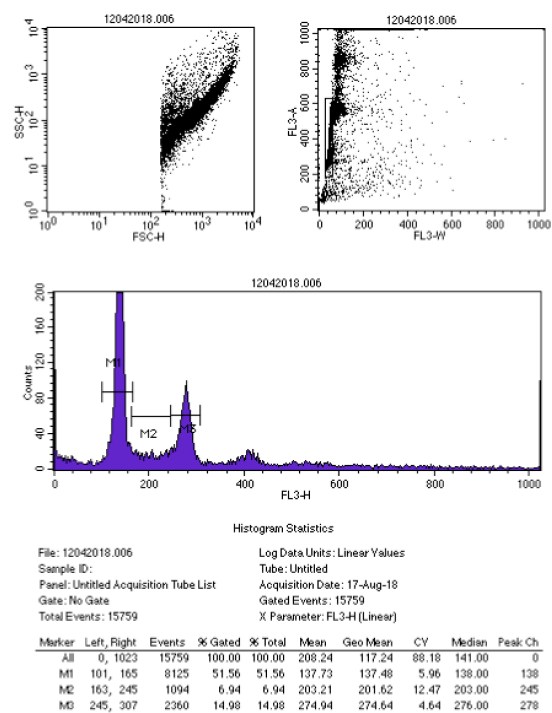

HH27+PBS+6h

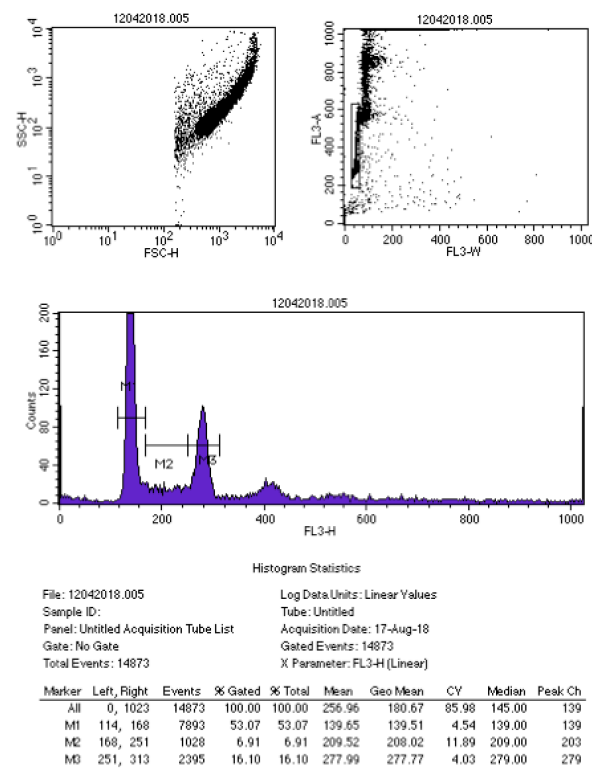

HH27 left+6h

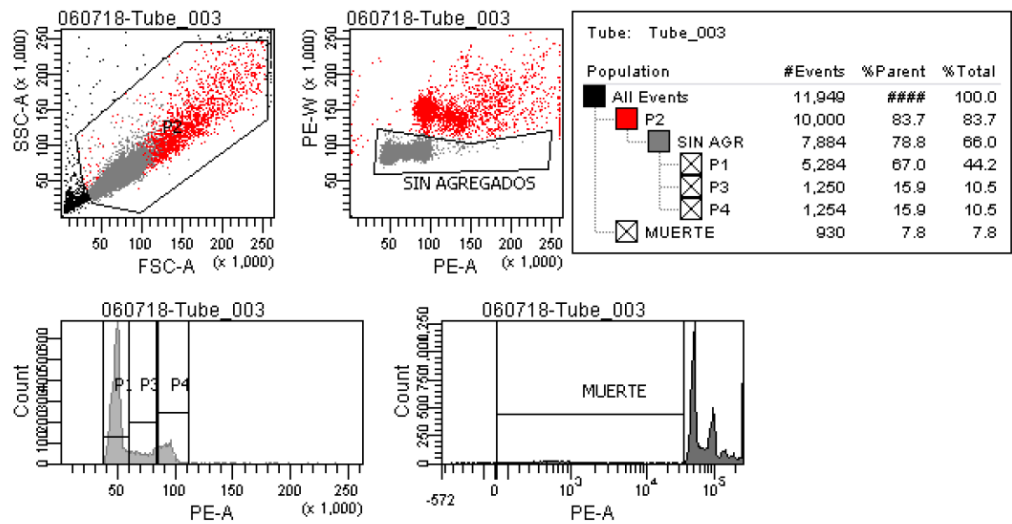

HH27+FGF8+6h

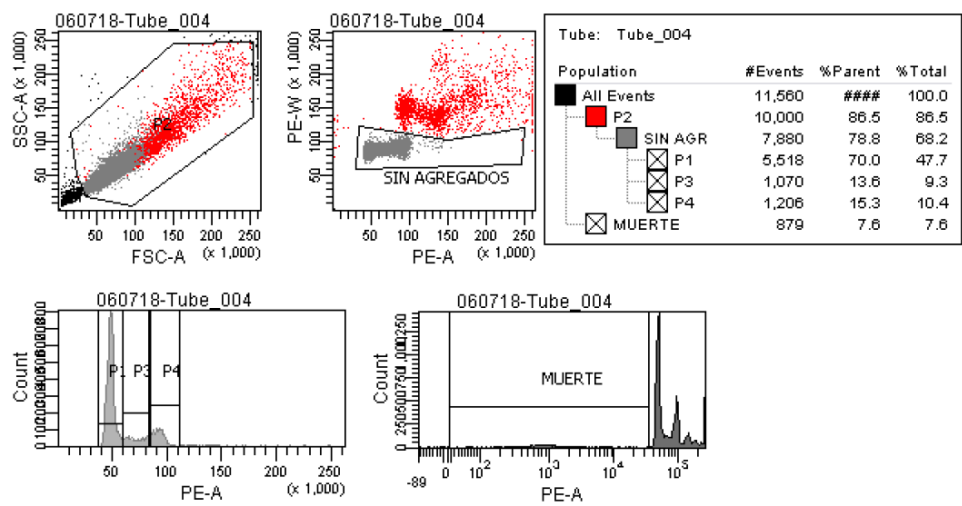

Supplement: supp [file elife_poa_e37429_Figure_4_source_data_1.pdf › elife_poa_e37429_Figure_4_source_data_1.pdf]
