# Supplementary material for: An intrinsic cell cycle timer terminates limb bud outgrowth
Source: eLife. 2018 Sep 3;7:e37429. doi: 10.7554/eLife.37429 (PMC6143340; doi:10.7554/eLife.37429)
Supplement: Supplementary file 1. — HH24 distal mesenchyme 55 genes are differentially expressed between HH24g and HH24 distal mesenchyme. 53 genes are increased in expression in HH24g distal mesenchyme and two genes are decreased in expression. [file elife-37429-supp1.xls]

Charts	ID	Symbol	Description	KEGG Pathways	FC	logFC	P.Value	adj.P.Val	Links	absFC	dirFC
	OLFML1	OLFML1	olfactomedin like 1	-	60.827	5.927	1.19E-09	4.53E-06	&nbsp;	60.82714472	up
	CBLN4	CBLN4	cerebellin 4 precursor	-	53.772	5.749	2.55E-08	3.61E-05	&nbsp;	53.77208408	up
	LAPTM4B	LAPTM4B	lysosomal protein transmembrane 4 beta	Lysosome	44.375	5.472	6.33E-08	6.29E-05	&nbsp;	44.37515688	up
	EYA4	EYA4	eyes absent homolog 4 (Drosophila)	-	24.892	4.638	2.69E-08	3.61E-05	&nbsp;	24.89213747	up
	CALCR	CALCR	calcitonin receptor	Neuroactive ligand-receptor interaction	19.903	4.315	7.19E-07	3.65E-04	&nbsp;	19.90313655	up
	SPON1	SPON1	spondin 1	-	18.297	4.194	1.56E-08	3.42E-05	&nbsp;	18.29740082	up
	TFAP2B	TFAP2B	transcription factor AP-2 beta (activating enhancer binding protein 2 beta)	-	18.095	4.178	2.15E-10	1.54E-06	&nbsp;	18.09543043	up
	KCNQ3	KCNQ3	"potassium voltage-gated channel, KQT-like subfamily, member 3"	-	15.065	3.913	1.98E-08	3.61E-05	&nbsp;	15.06453745	up
	LOC101747919	LOC101747919	uncharacterized LOC101747919	-	12.398	3.632	1.10E-06	4.58E-04	&nbsp;	12.39781662	up
	COL6A2	COL6A2	"collagen, type VI, alpha 2"	Focal adhesion ECM-receptor interaction	11.413	3.513	2.70E-10	1.54E-06	&nbsp;	11.41276442	up
	COL6A1	COL6A1	"collagen, type VI, alpha 1"	Focal adhesion ECM-receptor interaction	11.271	3.495	1.00E-11	2.29E-07	&nbsp;	11.27079494	up
	CLVS2	CLVS2	clavesin 2	-	10.464	3.387	8.38E-07	3.99E-04	&nbsp;	10.46410012	up
	KCNQ1	KCNQ1	potassium voltage-gated channel subfamily Q member 1	Adrenergic signaling	9.849	3.3	2.85E-08	3.62E-05	&nbsp;	9.848714591	up
	LAMA2	LAMA2	"laminin, alpha 2"	Focal adhesion ECM-receptor interaction	8.948	3.162	6.12E-07	3.33E-04	&nbsp;	8.948326659	up
	TSHZ2	TSHZ2	teashirt zinc finger homeobox 2	-	8.215	3.038	3.33E-08	3.81E-05	&nbsp;	8.21497208	up
	CREB5	CREB5	cAMP responsive element binding protein 5	Adrenergic signaling	8.165	3.029	1.03E-09	4.53E-06	&nbsp;	8.165188233	up
	LOC107053206	LOC107053206	uncharacterized LOC107053206	-	7.987	2.998	8.96E-07	4.16E-04	&nbsp;	7.987217391	up
	SLITRK6	SLITRK6	SLIT and NTRK like family member 6	-	7.11	2.83	3.55E-09	1.16E-05	&nbsp;	7.109856775	up
	CALN1	CALN1	calneuron 1	-	6.862	2.779	1.10E-07	9.66E-05	&nbsp;	6.862368795	up
	BMP2	BMP2	bone morphogenetic protein 2	Hedgehog signaling pathway TGF-beta signaling pathway	6.166	2.624	1.62E-07	1.32E-04	&nbsp;	6.166022794	up
	COL4A2	COL4A2	"collagen, type IV, alpha 2"	Focal adhesion ECM-receptor interaction	6.132	2.616	3.03E-08	3.65E-05	&nbsp;	6.131669396	up
	FAM46A	FAM46A	"family with sequence similarity 46, member A"	-	6.132	2.616	2.25E-07	1.66E-04	&nbsp;	6.131518425	up
	LRRC17	LRRC17	leucine rich repeat containing 17	-	5.947	2.572	1.65E-08	3.42E-05	&nbsp;	5.946935375	up
	FHOD3	FHOD3	formin homology 2 domain containing 3	-	5.548	2.472	1.75E-10	1.54E-06	&nbsp;	5.547982453	up
	ENPP1	ENPP1	ectonucleotide pyrophosphatase/phosphodiesterase 1	Purine metabolism Starch and sucrose metabolism Riboflavin metabolism Nicotinate and nicotinamide metablism Pantothenate and CoA biosynthesis	4.981	2.316	1.16E-06	4.64E-04	&nbsp;	4.980768638	up
	COL12A1	COL12A1	"collagen, type XII, alpha 1"	-	4.632	2.212	4.67E-09	1.33E-05	&nbsp;	4.632044377	up
	SPO11	SPO11	SPO11 meiotic protein covalently bound to DSB homolog (S. cerevisiae)	-	4.401	2.138	8.09E-09	2.05E-05	&nbsp;	4.401162926	up
	ARID5B	ARID5B	AT-rich interaction domain 5B	-	4.308	2.107	1.23E-07	1.04E-04	&nbsp;	4.308255689	up
	S1PR3	S1PR3	sphingosine-1-phosphate receptor 3	Neuroactive ligand-receptor interaction	4.235	2.083	2.66E-08	3.61E-05	&nbsp;	4.235425768	up
	SERPINI1	SERPINI1	"serpin peptidase inhibitor, clade I (neuroserpin), member 1"	-	4.232	2.081	6.46E-07	3.35E-04	&nbsp;	4.232432529	up
	COL4A1	COL4A1	"collagen, type IV, alpha 1"	Focal adhesion ECM-receptor interaction	3.807	1.929	2.58E-08	3.61E-05	&nbsp;	3.807347917	up
	RGS10	RGS10	regulator of G-protein signaling 10	-	3.771	1.915	4.37E-08	4.76E-05	&nbsp;	3.770585913	up
	MAGI2	MAGI2	"membrane associated guanylate kinase, WW and PDZ domain containing 2"	Tight junction	3.634	1.861	1.15E-06	4.64E-04	&nbsp;	3.633843461	up
	BNC2	BNC2	basonuclin 2	-	3.598	1.847	1.09E-07	9.66E-05	&nbsp;	3.597552611	up
	LPHN2	LPHN2	latrophilin 2	-	3.566	1.834	2.46E-07	1.70E-04	&nbsp;	3.565821555	up
	ADCY2	ADCY2	adenylate cyclase 2 (brain)	Purine metabolism Calcium signaling pathway Oocyte meiosis Adrenergic signaling Vascular smooth muscle contraction Gap junction GnRH signaling pathway Progesterone-mediated oocyte maturation Melanogenesis	3.38	1.757	7.61E-07	3.70E-04	&nbsp;	3.379569064	up
	TIPARP	TIPARP	TCDD-inducible poly(ADP-ribose) polymerase	-	3.224	1.689	4.54E-07	2.80E-04	&nbsp;	3.224186678	up
	RAB3IP	RAB3IP	RAB3A interacting protein	-	3.215	1.685	3.14E-07	2.05E-04	&nbsp;	3.214610349	up
	RUNX1T1	RUNX1T1	"runt-related transcription factor 1; translocated to, 1 (cyclin D-related)"	-	3.059	1.613	1.03E-06	4.37E-04	&nbsp;	3.059176401	up
	GPR126	GPR126	G protein-coupled receptor 126	-	3.028	1.598	2.11E-07	1.61E-04	&nbsp;	3.02790578	up
	AKR1D1	AKR1D1	"aldo-keto reductase family 1, member D1 (delta 4-3-ketosteroid-5-beta-reductase)"	Primary bile acid biosynthesis Steroid hormone biosynthesis	2.955	1.563	7.38E-08	7.02E-05	&nbsp;	2.954803457	up
	C3orf70	C3orf70	chromosome 3 open reading frame 70	-	2.873	1.522	4.78E-07	2.82E-04	&nbsp;	2.872655006	up
	LOC419389	LOC419389	uncharacterized LOC419389	-	2.808	1.49	2.34E-07	1.67E-04	&nbsp;	2.808013104	up
	ABCC3	ABCC3	"ATP-binding cassette, sub-family C (CFTR/MRP), member 3"	ABC transporters	2.799	1.485	4.82E-07	2.82E-04	&nbsp;	2.799319283	up
	CCDC85A	CCDC85A	coiled-coil domain containing 85A	-	2.753	1.461	1.92E-07	1.52E-04	&nbsp;	2.752609808	up
	KALRN	KALRN	"kalirin, RhoGEF kinase"	-	2.526	1.337	4.10E-07	2.60E-04	&nbsp;	2.526216496	up
	BMP7	BMP7	bone morphogenetic protein 7	Cytokine-cytokine receptor interaction TGF-beta signaling pathway	2.463	1.3	5.46E-08	5.67E-05	&nbsp;	2.462511628	up
	GPC3	-	-	-	2.463	1.301	5.97E-07	3.33E-04		2.463351718	up
	EVA1A	EVA1A	eva-1 homolog A (C. elegans)	-	2.378	1.249	5.44E-07	3.11E-04	&nbsp;	2.377557182	up
	SFRP1	SFRP1	secreted frizzled-related protein 1	Wnt signaling pathway	2.276	1.186	9.46E-07	4.22E-04	&nbsp;	2.275987957	up
	KLHL5	KLHL5	kelch-like family member 5	-	2.276	1.187	9.60E-07	4.22E-04	&nbsp;	2.276198849	up
	CTNNA2	CTNNA2	"catenin (cadherin-associated protein), alpha 2"	Adherens junction Tight junction	2.232	1.158	1.00E-06	4.32E-04	&nbsp;	2.23164192	up
	CCND1	CCND1	cyclin D1	FoxO signaling pathway Cell cycle p53 signaling pathway Wnt signaling pathway Focal adhesion Jak-STAT signaling pathway	2.18	1.124	2.74E-07	1.84E-04	&nbsp;	2.180101691	up
	IL17RD	IL17RD	interleukin 17 receptor D	-	-2.065	-1.046	6.34E-07	3.35E-04	&nbsp;	2.064853145	down
	LOC107057199	LOC107057199	borealin-like	-	-116.303	-6.862	2.20E-08	3.61E-05	&nbsp;	116.3031357	down
