# Supplementary material for: An intrinsic cell cycle timer terminates limb bud outgrowth
Source: eLife. 2018 Sep 3;7:e37429. doi: 10.7554/eLife.37429 (PMC6143340; doi:10.7554/eLife.37429)
Supplement: Supplementary file 2. — HH29 distal mesenchyme 99 genes are differentially expressed between HH24g and HH29 distal mesenchyme. 55 genes are increased in expression in HH24g distal mesenchyme and 44 genes are decreased in expression. [file elife-37429-supp2.xls]

Charts	ID	Symbol	Description	KEGG Pathways	FC	logFC	P.Value	adj.P.Val	Links	absFC	dirFC
	FGF18	FGF18	fibroblast growth factor 18	MAPK signaling pathway Regulation of actin cytoskeleton	27.273	4.769	1.96E-10	5.58E-07	&nbsp;	27.27343057	up
	IGDCC3	IGDCC3	"immunoglobulin superfamily, DCC subclass, member 3"	-	25.081	4.649	2.40E-11	1.18E-07	&nbsp;	25.08141649	up
	SCUBE1	SCUBE1	"signal peptide, CUB domain, EGF-like 1"	-	23.998	4.585	1.74E-12	1.99E-08	&nbsp;	23.99817681	up
	APOD	APOD	apolipoprotein D	-	23.27	4.54	2.07E-09	2.63E-06	&nbsp;	23.26963	up
	HBAP	HBAP	"hemoglobin alpha, subunit pi"	-	15.614	3.965	2.51E-06	4.73E-04	&nbsp;	15.61414125	up
	BPI	BPI	bactericidal/permeability-increasing protein	-	14.503	3.858	4.10E-09	4.18E-06	&nbsp;	14.50302147	up
	GBX2	GBX2	gastrulation brain homeobox 2	-	14.152	3.823	1.06E-08	6.99E-06	&nbsp;	14.15242017	up
	SALL3	SALL3	spalt-like transcription factor 3	-	11.898	3.573	2.25E-07	8.15E-05	&nbsp;	11.8981387	up
	GREM1	GREM1	"gremlin 1, DAN family BMP antagonist"	-	11.432	3.515	6.99E-07	1.90E-04	&nbsp;	11.43169044	up
	ZBTB16	ZBTB16	zinc finger and BTB domain containing 16	-	10.186	3.349	1.07E-06	2.51E-04	&nbsp;	10.18646012	up
	DLX2	DLX2	distal-less homeobox 2	-	10.131	3.341	8.07E-10	1.42E-06	&nbsp;	10.13128496	up
	PKIA	PKIA	"protein kinase (cAMP-dependent, catalytic) inhibitor alpha"	-	9.16	3.195	2.59E-11	1.18E-07	&nbsp;	9.160298017	up
	EGR1	EGR1	early growth response 1	-	8.74	3.128	9.00E-09	6.23E-06	&nbsp;	8.740101938	up
	PHACTR1	PHACTR1	phosphatase and actin regulator 1	-	8.481	3.084	2.64E-06	4.85E-04	&nbsp;	8.481328926	up
	LOC100859704	LOC100859704	potassium/sodium hyperpolarization-activated cyclic nucleotide-gated channel 4-like	-	8.322	3.057	1.35E-08	8.31E-06	&nbsp;	8.322443356	up
	HGF	HGF	hepatocyte growth factor	Cytokine-cytokine receptor interaction Focal adhesion	8.179	3.032	3.07E-07	1.03E-04	&nbsp;	8.179105088	up
	ZNF687	ZNF687	zinc finger protein 687	-	7.957	2.992	6.41E-09	4.88E-06	&nbsp;	7.957060781	up
	ACOT9	ACOT9	acyl-CoA thioesterase 9	-	7.655	2.936	3.76E-11	1.43E-07	&nbsp;	7.655378112	up
	LONRF3	LONRF3	LON peptidase N-terminal domain and ring finger 3	-	7.326	2.873	1.82E-06	3.79E-04	&nbsp;	7.326037056	up
	LOC107050935	LOC107050935	calmodulin-binding transcription activator 2-like	-	6.996	2.807	5.14E-07	1.51E-04	&nbsp;	6.996244559	up
	PLEK	PLEK	pleckstrin	-	6.249	2.644	1.30E-11	9.90E-08	&nbsp;	6.249200855	up
	PHLDA1	PHLDA1	pleckstrin homology like domain family A member 1	-	5.978	2.58	2.18E-08	1.13E-05	&nbsp;	5.97847211	up
	NPY2R	NPY2R	neuropeptide Y receptor Y2	Neuroactive ligand-receptor interaction	5.432	2.442	3.56E-09	4.06E-06	&nbsp;	5.43234837	up
	LOC107055618	LOC107055618	basic proline-rich protein-like	-	5.217	2.383	1.55E-06	3.37E-04	&nbsp;	5.21717387	up
	LOC107055593	LOC107055593	uncharacterized LOC107055593	-	5.131	2.359	1.08E-06	2.52E-04	&nbsp;	5.130558056	up
	NPM3	NPM3	nucleophosmin/nucleoplasmin 3	-	4.895	2.291	2.95E-09	3.55E-06	&nbsp;	4.895005357	up
	LIN28B	LIN28B	lin-28 homolog B (C. elegans)	-	4.295	2.103	1.86E-09	2.50E-06	&nbsp;	4.295022205	up
	SALL1	SALL1	sal-like 1 (Drosophila)	-	3.854	1.946	1.34E-08	8.31E-06	&nbsp;	3.8540825	up
	EPHA4	EPHA4	EPH receptor A4	-	3.514	1.813	1.75E-09	2.50E-06	&nbsp;	3.514405198	up
	ENPP1	ENPP1	ectonucleotide pyrophosphatase/phosphodiesterase 1	Purine metabolism Starch and sucrose metabolism Riboflavin metabolism Nicotinate and nicotinamide metablism Pantothenate and CoA biosynthesis	3.469	1.794	1.01E-06	2.42E-04	&nbsp;	3.468951123	up
	PHLDA2	PHLDA2	pleckstrin homology like domain family A member 2	-	3.361	1.749	1.99E-08	1.06E-05	&nbsp;	3.361273522	up
	KERA	KERA	keratocan	-	3.296	1.721	1.53E-08	8.94E-06	&nbsp;	3.295635377	up
	CAMKK1	CAMKK1	"calcium/calmodulin-dependent protein kinase kinase 1, alpha"	Adipocytokine signaling pathway	3.236	1.694	6.12E-08	2.69E-05	&nbsp;	3.235680489	up
	FGF13	FGF13	fibroblast growth factor 13	MAPK signaling pathway Regulation of actin cytoskeleton	3.12	1.642	2.86E-08	1.36E-05	&nbsp;	3.120277239	up
	PRTG	PRTG	protogenin	-	2.968	1.569	1.14E-06	2.62E-04	&nbsp;	2.967911152	up
	SALL4	SALL4	spalt-like transcription factor 4	-	2.942	1.557	1.71E-08	9.52E-06	&nbsp;	2.941745096	up
	PROM1	PROM1	prominin 1	-	2.873	1.522	4.70E-09	4.18E-06	&nbsp;	2.872788275	up
	SMCO4	SMCO4	single-pass membrane protein with coiled-coil domains 4	-	2.868	1.52	2.23E-06	4.35E-04	&nbsp;	2.868024597	up
	GREB1	GREB1	growth regulation by estrogen in breast cancer 1	-	2.839	1.505	2.32E-06	4.44E-04	&nbsp;	2.83881827	up
	AGPAT5	AGPAT5	1-acylglycerol-3-phosphate O-acyltransferase 5	Glycerolipid metabolism Glycerophospholipid metabolism	2.764	1.467	1.73E-07	6.69E-05	&nbsp;	2.764323572	up
	TP53I11	TP53I11	tumor protein p53 inducible protein 11	-	2.668	1.416	6.38E-09	4.88E-06	&nbsp;	2.668475451	up
	TBC1D7	TBC1D7	TBC1 domain family member 7	-	2.62	1.39	2.13E-07	7.85E-05	&nbsp;	2.620129958	up
	RFTN1	RFTN1	"raftlin, lipid raft linker 1"	-	2.605	1.382	2.53E-06	4.73E-04	&nbsp;	2.605467708	up
	MAPK11	MAPK11	mitogen-activated protein kinase 11	MAPK signaling pathway FoxO signaling pathway Adrenergic signaling VEGF signaling pathway Toll-like receptor signaling pathway NOD-like receptor signaling pathway  receptor signaling GnRH signaling pathway Progesterone-mediated oocyte maturation Salmonella infection Influenza A	2.588	1.372	1.63E-09	2.48E-06	&nbsp;	2.588130988	up
	RHOU	RHOU	ras homolog family member U	-	2.563	1.358	7.60E-09	5.60E-06	&nbsp;	2.563215192	up
	TFRC	TFRC	"transferrin receptor (p90, CD71)"	Endocytosis Phagosome	2.525	1.336	4.10E-07	1.27E-04	&nbsp;	2.524960851	up
	WFDC1	WFDC1	WAP four-disulfide core domain 1	-	2.515	1.331	2.68E-08	1.30E-05	&nbsp;	2.514903152	up
	KIF26A	KIF26A	kinesin family member 26A	-	2.49	1.316	4.68E-09	4.18E-06	&nbsp;	2.490198766	up
	NRP1	NRP1	neuropilin 1	-	2.481	1.311	4.08E-07	1.27E-04	&nbsp;	2.481258568	up
	PGK1	PGK1	phosphoglycerate kinase 1	Glycolysis  Gluconeogenesis	2.35	1.233	1.64E-10	5.34E-07	&nbsp;	2.349965634	up
	HOXA10-AS	HOXA10-AS	HOXA10 antisense RNA	-	2.213	1.146	1.86E-06	3.79E-04	&nbsp;	2.212538306	up
	IL17RD	IL17RD	interleukin 17 receptor D	-	2.183	1.126	8.64E-09	6.17E-06	&nbsp;	2.182507428	up
	SLC25A22	SLC25A22	"solute carrier family 25 (mitochondrial carrier: glutamate), member 22"	-	2.176	1.122	1.40E-06	3.11E-04	&nbsp;	2.176064871	up
	TRIL	TRIL	TLR4 interactor with leucine-rich repeats	-	2.081	1.058	6.69E-07	1.86E-04	&nbsp;	2.081479948	up
	TSC22D1	TSC22D1	"TSC22 domain family, member 1"	-	-2.054	-1.039	1.54E-06	3.37E-04	&nbsp;	2.054178307	down
	LMO7	LMO7	LIM domain 7	Adherens junction	-2.058	-1.041	5.05E-07	1.50E-04	&nbsp;	2.058027376	down
	PDGFRA	PDGFRA	"platelet-derived growth factor receptor, alpha polypeptide"	MAPK signaling pathway Calcium signaling pathway Cytokine-cytokine receptor interatction Endocytosis Focal adhesion Gap junction Regulation of actin cytoskeleton	-2.088	-1.062	1.29E-06	2.91E-04	&nbsp;	2.088013329	down
	LOC107051702	LOC107051702	uncharacterized LOC107051702	-	-2.25	-1.17	2.10E-06	4.20E-04	&nbsp;	2.249666265	down
	FGFR2	FGFR2	fibroblast growth factor receptor 2	MAPK signaling pathway Endocytosis Regulation of actin cytoskeleton	-2.267	-1.181	9.32E-08	3.94E-05	&nbsp;	2.266943551	down
	ITGA2	ITGA2	"integrin, alpha 2 (CD49B, alpha 2 subunit of VLA-2 receptor)"	Phagosome Focal adhesion ECM-receptor interaction Regulation of actin cytoskeleton	-2.274	-1.185	3.22E-07	1.07E-04	&nbsp;	2.273952871	down
	COL25A1	COL25A1	"collagen, type XXV, alpha 1"	-	-2.308	-1.207	8.23E-07	2.09E-04	&nbsp;	2.308203701	down
	LOC107055688	LOC107055688	collagen alpha-1(I) chain-like	-	-2.333	-1.222	2.56E-06	4.76E-04	&nbsp;	2.333414679	down
	NCKAP5	NCKAP5	NCK associated protein 5	-	-2.344	-1.229	2.40E-06	4.57E-04	&nbsp;	2.344195594	down
	FAM101A	FAM101A	family with sequence similarity 101 member A	-	-2.443	-1.288	1.47E-08	8.80E-06	&nbsp;	2.442730112	down
	NEDD9	NEDD9	"neural precursor cell expressed, developmentally down-regulated 9"	-	-2.447	-1.291	1.07E-08	6.99E-06	&nbsp;	2.447348713	down
	SESN3	SESN3	sestrin 3	p53 signaling pathway	-2.47	-1.304	6.15E-09	4.88E-06	&nbsp;	2.469588968	down
	FBLN1	FBLN1	fibulin 1	-	-2.488	-1.315	7.85E-10	1.42E-06	&nbsp;	2.488487247	down
	LAMA4	LAMA4	"laminin, alpha 4"	Focal adhesion ECM-receptor interaction	-2.504	-1.324	9.70E-07	2.36E-04	&nbsp;	2.504355645	down
	CSRNP1	CSRNP1	cysteine-serine-rich nuclear protein 1	-	-2.612	-1.385	2.15E-06	4.27E-04	&nbsp;	2.611789353	down
	PTPRT	PTPRT	"protein tyrosine phosphatase, receptor type, T"	-	-2.707	-1.437	3.83E-07	1.23E-04	&nbsp;	2.707445332	down
	SSBP2	SSBP2	single-stranded DNA binding protein 2	-	-2.713	-1.44	5.01E-07	1.50E-04	&nbsp;	2.712781847	down
	ARHGAP18	ARHGAP18	Rho GTPase activating protein 18	-	-2.907	-1.539	5.75E-09	4.87E-06	&nbsp;	2.906803866	down
	COL3A1	COL3A1	"collagen, type III, alpha 1"	Focal adhesion ECM-receptor interaction	-2.993	-1.582	1.76E-08	9.59E-06	&nbsp;	2.993360047	down
	LOC422301	LOC422301	zinc finger protein 185-like	-	-3.005	-1.587	2.76E-07	9.55E-05	&nbsp;	3.004681231	down
	LOC101750014	LOC101750014	uncharacterized LOC101750014	-	-3.023	-1.596	1.05E-06	2.50E-04	&nbsp;	3.023299354	down
	PCDH10	PCDH10	protocadherin 10	-	-3.092	-1.629	3.65E-08	1.70E-05	&nbsp;	3.092258185	down
	POSTN	POSTN	"periostin, osteoblast specific factor"	-	-3.093	-1.629	6.16E-07	1.78E-04	&nbsp;	3.09287447	down
	MXRA5	MXRA5	matrix-remodelling associated 5	-	-3.138	-1.65	2.91E-07	9.92E-05	&nbsp;	3.137973827	down
	ARIH1	ARIH1	ariadne RBR E3 ubiquitin protein ligase 1	-	-3.227	-1.69	4.05E-09	4.18E-06	&nbsp;	3.227292091	down
	RELN	RELN	reelin	Focal adhesion ECM-receptor interaction	-3.252	-1.701	2.56E-07	8.98E-05	&nbsp;	3.252233477	down
	PAPLN	PAPLN	"papilin, proteoglycan-like sulfated glycoprotein"	-	-3.848	-1.944	6.51E-08	2.81E-05	&nbsp;	3.848389882	down
	HTR1B	HTR1B	"5-hydroxytryptamine (serotonin) receptor 1B, G protein-coupled"	Neuroactive ligand-receptor interaction	-3.999	-2	5.16E-08	2.31E-05	&nbsp;	3.999139787	down
	COL17A1	COL17A1	"collagen, type XVII, alpha 1"	-	-4.174	-2.062	4.58E-10	9.52E-07	&nbsp;	4.174418996	down
	BAMBI	BAMBI	BMP and activin membrane-bound inhibitor homolog (Xenopus laevis)	Wnt signaling pathway TGF-beta signaling pathway	-4.47	-2.16	2.81E-10	7.13E-07	&nbsp;	4.469503962	down
	LGR5	LGR5	leucine-rich repeat containing G protein-coupled receptor 5	-	-4.495	-2.168	2.54E-08	1.26E-05	&nbsp;	4.494646584	down
	ZEB2	ZEB2	zinc finger E-box binding homeobox 2	-	-4.744	-2.246	4.91E-08	2.24E-05	&nbsp;	4.743866829	down
	LOC107051213	LOC107051213	uncharacterized LOC107051213	-	-5.447	-2.446	7.76E-07	1.99E-04	&nbsp;	5.447278934	down
	SIRT4	SIRT4	sirtuin 4	-	-5.708	-2.513	2.41E-08	1.22E-05	&nbsp;	5.708112452	down
	LOC416696	LOC416696	"collagen, type VII, alpha 1-like"	-	-5.854	-2.549	1.59E-12	1.99E-08	&nbsp;	5.854253728	down
	LOC107053920	LOC107053920	uncharacterized LOC107053920	-	-6.011	-2.588	9.23E-10	1.51E-06	&nbsp;	6.010750925	down
	HOXC13	HOXC13	homeobox C13	-	-6.077	-2.603	1.71E-06	3.65E-04	&nbsp;	6.077005385	down
	RDH10	RDH10	retinol dehydrogenase 10 (all-trans)	Retinol metabolism	-7.873	-2.977	7.63E-07	1.99E-04	&nbsp;	7.872518909	down
	A4GALT	A4GALT	"alpha 1,4-galactosyltransferase"	-	-10.745	-3.426	8.43E-07	2.12E-04	&nbsp;	10.74533171	down
	MAPK10	MAPK10	mitogen-activated protein kinase 10	MAPK signaling pathway ErbB signaling pathway FoxO signaling pathway Protein processing in endoplasmic reticulum Wnt signaling pathway Focal adhesion Toll-like receptor signaling NOD-like receptor signaling pathway Insulin signaling pathway GnRH signaling pathway Progesterone-mediated oocyte maturation Adipocytokine signaling pathway Salmonella infection Influenza A Herpes simplex infection	-12.379	-3.63	1.67E-07	6.56E-05	&nbsp;	12.37923417	down
	ADGRD1	ADGRD1	adhesion G protein-coupled receptor D1	-	-14.786	-3.886	1.42E-07	5.77E-05	&nbsp;	14.78628727	down
	LIMCH1	LIMCH1	LIM and calponin homology domains 1	-	-15.868	-3.988	3.87E-10	8.83E-07	&nbsp;	15.86843463	down
	GRID2	GRID2	"glutamate receptor, ionotropic, delta 2"	Neuroactive ligand-receptor interaction	-17.35	-4.117	9.35E-07	2.30E-04	&nbsp;	17.35019517	down
	PDGFD	PDGFD	platelet derived growth factor D	Focal adhesion Gap junction Regulation of actin cytoskeleton	-17.545	-4.133	4.76E-09	4.18E-06	&nbsp;	17.54496435	down
	LOC107057199	LOC107057199	borealin-like	-	-53.424	-5.739	4.34E-09	4.18E-06	&nbsp;	53.42379605	down
