# Supplementary material for: An intrinsic cell cycle timer terminates limb bud outgrowth
Source: eLife. 2018 Sep 3;7:e37429. doi: 10.7554/eLife.37429 (PMC6143340; doi:10.7554/eLife.37429)
Supplement: Supplementary file 3. — Cluster 1: genes that increase between HH24 and HH29 (black line) and are maintained in HH24g distal mesenchyme. [file elife-37429-supp3.xls]

ID	Symbol	HH24g vs. HH24	HH24g vs. HH29
ABCC3	ABCC3	1.4851	-0.2481
ADCY2	ADCY2	1.7568	-0.6678
AKR1D1	AKR1D1	1.5631	-0.5014
ARID5B	ARID5B	2.1071	-1.2076
BMP2	BMP2	2.6243	0.3451
BMP7	BMP7	1.3001	0.6166
BNC2	BNC2	1.847	-0.4736
C3orf70	C3orf70	1.5224	-0.2919
CALCR	CALCR	4.3149	1.6759
CALN1	CALN1	2.7787	-0.1368
CBLN4	CBLN4	5.7488	2.1791
CCDC85A	CCDC85A	1.4608	-0.0139
CCND1	CCND1	1.1244	-0.0746
CLVS2	CLVS2	3.3874	-0.2502
COL12A1	COL12A1	2.2116	-0.9022
COL4A1	COL4A1	1.9288	0.4296
COL4A2	COL4A2	2.6163	0.2041
COL6A1	COL6A1	3.4945	-0.4566
COL6A2	COL6A2	3.5126	0.1308
CREB5	CREB5	3.0295	-1.025
CTNNA2	CTNNA2	1.1581	-0.5997
ENPP1	ENPP1	2.3164	1.7945
EVA1A	EVA1A	1.2495	0.1539
EYA4	EYA4	4.6376	-0.3143
FAM46A	FAM46A	2.6162	0.9893
FHOD3	FHOD3	2.472	0.0554
GPC3		1.3006	0.7293
GPR126	GPR126	1.5983	0.1728
KALRN	KALRN	1.337	-0.1059
KCNQ1	KCNQ1	3.2999	0.3553
KCNQ3	KCNQ3	3.9131	0.5822
KLHL5	KLHL5	1.1866	0.3372
LAMA2	LAMA2	3.1616	-0.9585
LAPTM4B	LAPTM4B	5.4717	2.324
LOC101747919	LOC101747919	3.632	-1.5496
LOC107053206	LOC107053206	2.9977	-1.0302
LOC419389	LOC419389	1.4895	-0.7395
LPHN2	LPHN2	1.8342	-0.2132
LRRC17	LRRC17	2.5721	-1.203
MAGI2	MAGI2	1.8615	-0.158
OLFML1	OLFML1	5.9266	0.3364
RAB3IP	RAB3IP	1.6846	0.4099
RGS10	RGS10	1.9148	-0.121
RUNX1T1	RUNX1T1	1.6131	-0.8913
S1PR3	S1PR3	2.0825	-0.1006
SERPINI1	SERPINI1	2.0815	0.0812
SFRP1	SFRP1	1.1865	-0.7656
SLITRK6	SLITRK6	2.8298	-0.4102
SPO11	SPO11	2.1379	0.9171
SPON1	SPON1	4.1936	0.0611
TFAP2B	TFAP2B	4.1776	-0.1751
TIPARP	TIPARP	1.6889	0.0136
TSHZ2	TSHZ2	3.0383	0.5521
LOC107051702	LOC107051702	1.163	-1.1697
