# Supplementary material for: An intrinsic cell cycle timer terminates limb bud outgrowth
Source: eLife. 2018 Sep 3;7:e37429. doi: 10.7554/eLife.37429 (PMC6143340; doi:10.7554/eLife.37429)
Supplement: Supplementary file 4. — Cluster 2: genes that increase between HH24 and HH29 (black line) and reset in HH24g distal mesenchyme. [file elife-37429-supp4.xls]

ID	Symbol	HH24g vs. HH24	HH24g vs. HH29
LOC107057199	LOC107057199	-6.8617	-5.7394
A4GALT	A4GALT	-1.5167	-3.4256
ADGRD1	ADGRD1	2.6892	-3.8862
ARHGAP18	ARHGAP18	0.4311	-1.5394
ARIH1	ARIH1	-0.249	-1.6903
BAMBI	BAMBI	0.5105	-2.1601
COL17A1	COL17A1	0.5296	-2.0616
COL25A1	COL25A1	0.6805	-1.2068
COL3A1	COL3A1	-0.2465	-1.5818
CSRNP1	CSRNP1	0.6719	-1.385
FAM101A	FAM101A	0.3008	-1.2885
FBLN1	FBLN1	-0.3076	-1.3153
FGFR2	FGFR2	0.3287	-1.1807
GRID2	GRID2	-1.5527	-4.1169
HOXC13	HOXC13	0.2404	-2.6034
HTR1B	HTR1B	0.0698	-1.9997
ITGA2	ITGA2	-0.0488	-1.1852
LAMA4	LAMA4	-1.4911	-1.3244
LGR5	LGR5	2.0117	-2.1682
LIMCH1	LIMCH1	0.7118	-3.9881
LMO7	LMO7	0.551	-1.0413
LOC101750014	LOC101750014	0.1032	-1.5961
LOC107051213	LOC107051213	-0.1512	-2.4455
LOC107053920	LOC107053920	0.1778	-2.5875
LOC107055688	LOC107055688	-0.7208	-1.2224
LOC416696	LOC416696	0.2922	-2.5495
LOC422301	LOC422301	-0.3176	-1.5872
MAPK10	MAPK10	-1.2793	-3.6299
MXRA5	MXRA5	-0.1202	-1.6498
NCKAP5	NCKAP5	-0.0308	-1.2291
NEDD9	NEDD9	0.0818	-1.2912
PAPLN	PAPLN	1.0425	-1.9443
PCDH10	PCDH10	1.0536	-1.6287
PDGFD	PDGFD	0.12	-4.133
PDGFRA	PDGFRA	0.5612	-1.0621
POSTN	POSTN	0.2424	-1.6289
PTPRT	PTPRT	0.2538	-1.4369
RDH10	RDH10	0.7225	-2.9768
RELN	RELN	0.1976	-1.7014
SESN3	SESN3	-7.00E-04	-1.3043
SIRT4	SIRT4	0.1759	-2.513
SSBP2	SSBP2	-0.0898	-1.4398
TSC22D1	TSC22D1	0.3168	-1.0386
ZEB2	ZEB2	1.303	-2.2461
