# Supplementary material for: An intrinsic cell cycle timer terminates limb bud outgrowth
Source: eLife. 2018 Sep 3;7:e37429. doi: 10.7554/eLife.37429 (PMC6143340; doi:10.7554/eLife.37429)
Supplement: Supplementary file 5. — Cluster 3: genes that decrease between HH24 and HH29 (black line) and reset in HH24g distal mesenchyme. [file elife-37429-supp5.xls]

ID	Symbol	HH24g vs. HH24	HH24g vs. HH29
IL17RD	IL17RD	-1.046	1.126
ACOT9	ACOT9	-0.0547	2.9365
AGPAT5	AGPAT5	-0.1034	1.4669
APOD	APOD	-0.7184	4.5404
BPI	BPI	2.8415	3.8583
CAMKK1	CAMKK1	0.2954	1.6941
DLX2	DLX2	-0.0533	3.3407
EGR1	EGR1	2.8699	3.1277
EPHA4	EPHA4	-0.6425	1.8133
FGF13	FGF13	0.2712	1.6417
FGF18	FGF18	-1.7086	4.7694
GBX2	GBX2	-2.0736	3.823
GREB1	GREB1	-1.1293	1.5053
GREM1	GREM1	-0.4378	3.515
HBAP	HBAP	-0.0141	3.9648
HGF	HGF	-1.1489	3.0319
HOXA10-AS	HOXA10-AS	-0.7824	1.1457
IGDCC3	IGDCC3	-1.3655	4.6485
KERA	KERA	-0.93	1.7206
KIF26A	KIF26A	-0.7651	1.3163
LIN28B	LIN28B	-1.0366	2.1027
LOC100859704	LOC100859704	0.1971	3.057
LOC107050935	LOC107050935	-0.7246	2.8066
LOC107055593	LOC107055593	-0.3806	2.3591
LOC107055618	LOC107055618	-0.333	2.3833
LONRF3	LONRF3	0.1215	2.873
MAPK11	MAPK11	-0.582	1.3719
NPM3	NPM3	-0.7743	2.2913
NPY2R	NPY2R	-0.8394	2.4416
NRP1	NRP1	-0.2868	1.3111
PGK1	PGK1	-0.482	1.2326
PHACTR1	PHACTR1	-1.544	3.0843
PHLDA1	PHLDA1	1.3304	2.5798
PHLDA2	PHLDA2	0.6017	1.749
PKIA	PKIA	0.1475	3.1954
PLEK	PLEK	-0.2366	2.6437
PROM1	PROM1	1.2515	1.5225
PRTG	PRTG	-0.3695	1.5694
RFTN1	RFTN1	-0.7432	1.3815
RHOU	RHOU	0.0344	1.358
SALL1	SALL1	-1.4064	1.9464
SALL3	SALL3	-1.5205	3.5727
SALL4	SALL4	-1.2973	1.5567
SCUBE1	SCUBE1	-0.9058	4.5849
SLC25A22	SLC25A22	0.1737	1.1217
SMCO4	SMCO4	0.9051	1.5201
TBC1D7	TBC1D7	-1.1951	1.3896
TFRC	TFRC	-0.3643	1.3363
TP53I11	TP53I11	0.8389	1.416
TRIL	TRIL	0.2518	1.0576
WFDC1	WFDC1	-0.1355	1.3305
ZBTB16	ZBTB16	-0.8828	3.3486
ZNF687	ZNF687	0.5439	2.9922
